# Supplementary material
Source: Springer Nature journal article supplement (https://www.springermedizin.de/resource/supplementary/12906_2014_1904_MOESM3_ESM.pdf/9523144)

IC50s and CC50s of fractions (µg/ml)

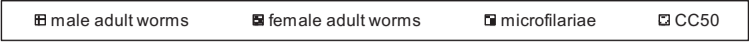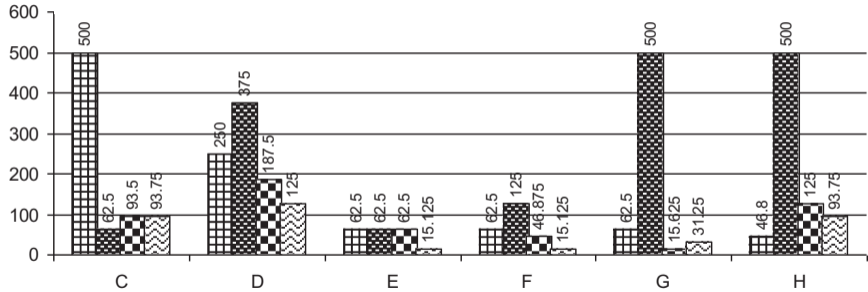

Most active fractions of CL leaves

Supplement: MOESM3 [file 9523144]
